# Supplementary material
Source: Research Square preprint supplement (doi:10.21203/rs.3.rs-9704879/v1)
Supplement: Supplementary file 1 [file c8ecdf9151c1cf6df2078867.docx]

Supplementary material


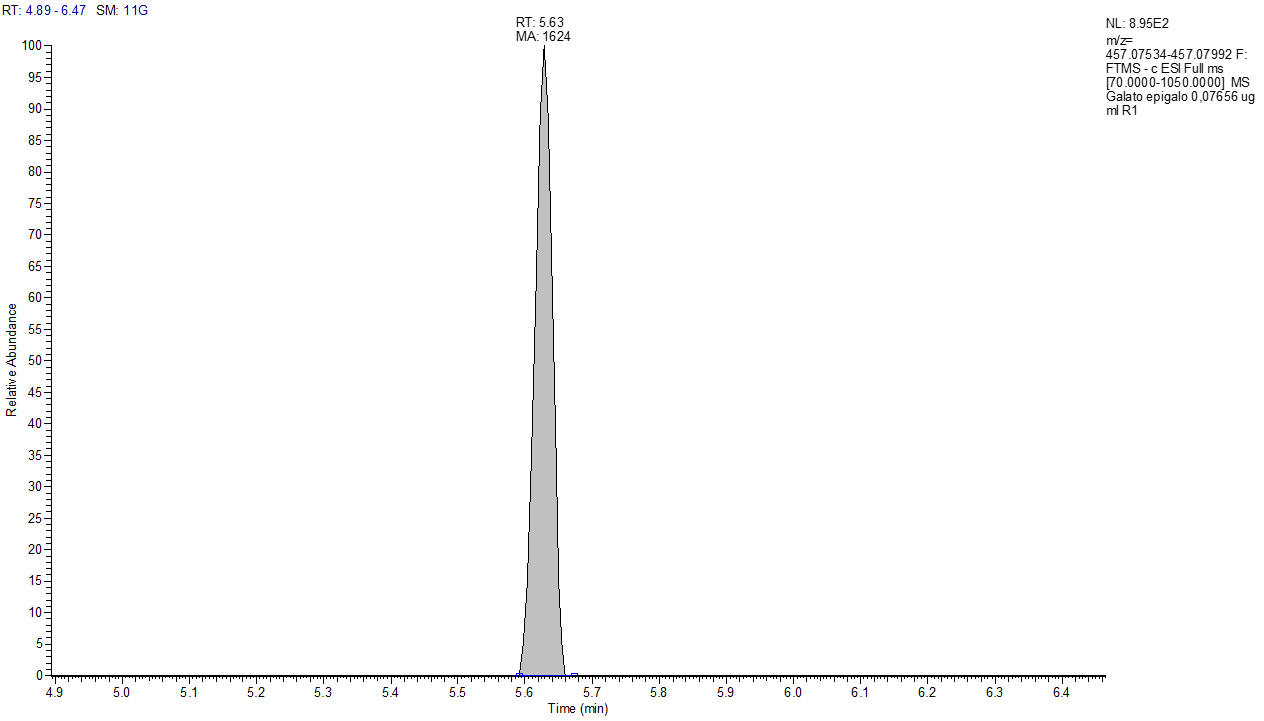


Figure S1: Extracted ion chromatogram of EGCG at 0.08 µg/mL.

Table S1: Results from calibration curve.
